# Supplementary material for: The JDRF CCTN CGM TIME Trial: Timing of Initiation of continuous glucose Monitoring in Established pediatric type 1 diabetes: study protocol, recruitment and baseline characteristics
Source: PubMed Central journal article supplement (PMC4109785; doi:10.1186/1471-2431-14-183), 2014-07-18

Additional File 3: Schedule of Study Visits, Telephone Contacts, and Outcome Assessments

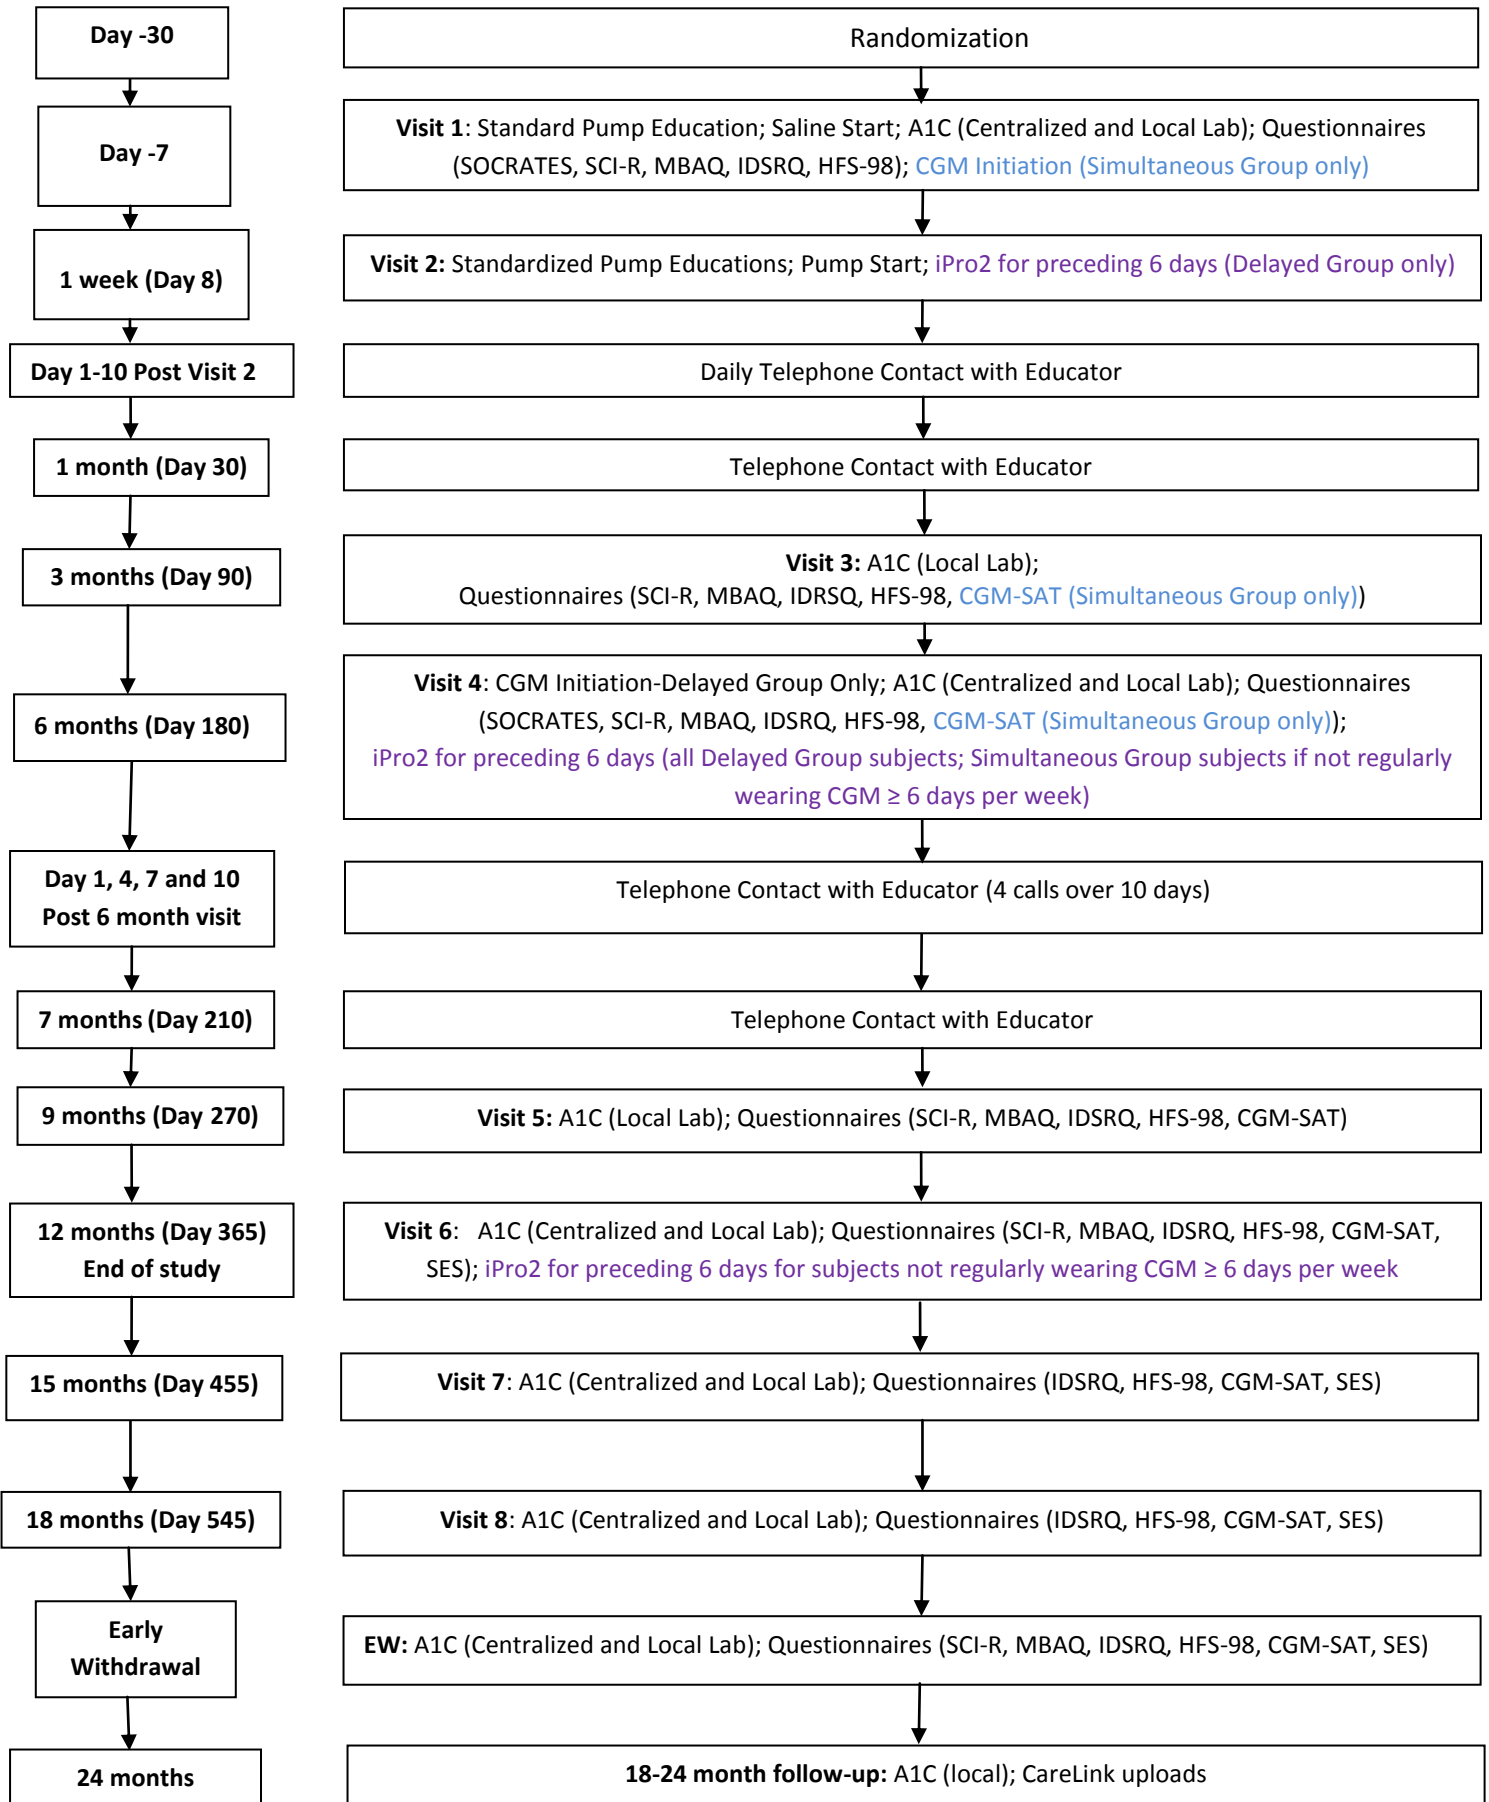

Supplement: 1471-2431-14-183-S3.pdf [file 1471-2431-14-183-S3.pdf]
